# Supplementary material for: Palatal development of preterm and low birthweight infants compared to term infants – What do we know? Part 2: The palate of the preterm/low birthweight infant
Source: PubMed Central journal article supplement (PMC1298321; doi:10.1186/1746-160x-1-9), 2005-10-28
Supplement: 1746-160X-1-9-S2.pdf [file 1746-160X-1-9-S2.pdf]

**Table 2.** Intubation-associated changes in palatal configuration and length.

| studies                                     | Patients                                                                                                                                                                                                                                                                                                                                                                                                                                                                                                                                                                                                                                                                                                                                                                                                                                                                                                                                                                                                                                                                                                                                 | Method and validity of method                                                                                                                                                                                                                                                                                                                                                                                                                                                                                                                                                                                                                                                                                                                                                                                                                                                                                                                                                                                                                                                                                                                                                                                                                                                                                                                                          | Results                                                                                                                                                                                                                                                                                                                                                                                                                                                                                                                                                                                                                                                                                                                                                                                                                                                                                                                                                                 |            |                   |                      |            |                     |        |        |   |                |        |       |      |           |        |       |      |                                             |          |          |   |             |           |               |            |                     |        |      |   |                |       |      |   |           |       |      |   |                            |          |          |   |
|---------------------------------------------|------------------------------------------------------------------------------------------------------------------------------------------------------------------------------------------------------------------------------------------------------------------------------------------------------------------------------------------------------------------------------------------------------------------------------------------------------------------------------------------------------------------------------------------------------------------------------------------------------------------------------------------------------------------------------------------------------------------------------------------------------------------------------------------------------------------------------------------------------------------------------------------------------------------------------------------------------------------------------------------------------------------------------------------------------------------------------------------------------------------------------------------|------------------------------------------------------------------------------------------------------------------------------------------------------------------------------------------------------------------------------------------------------------------------------------------------------------------------------------------------------------------------------------------------------------------------------------------------------------------------------------------------------------------------------------------------------------------------------------------------------------------------------------------------------------------------------------------------------------------------------------------------------------------------------------------------------------------------------------------------------------------------------------------------------------------------------------------------------------------------------------------------------------------------------------------------------------------------------------------------------------------------------------------------------------------------------------------------------------------------------------------------------------------------------------------------------------------------------------------------------------------------|-------------------------------------------------------------------------------------------------------------------------------------------------------------------------------------------------------------------------------------------------------------------------------------------------------------------------------------------------------------------------------------------------------------------------------------------------------------------------------------------------------------------------------------------------------------------------------------------------------------------------------------------------------------------------------------------------------------------------------------------------------------------------------------------------------------------------------------------------------------------------------------------------------------------------------------------------------------------------|------------|-------------------|----------------------|------------|---------------------|--------|--------|---|----------------|--------|-------|------|-----------|--------|-------|------|---------------------------------------------|----------|----------|---|-------------|-----------|---------------|------------|---------------------|--------|------|---|----------------|-------|------|---|-----------|-------|------|---|----------------------------|----------|----------|---|
| [24]                                        | -25 2- 5 Y old children, intubated for longer periods as neonates.<br>- GA 29.3 W (SD 4.1, range 24- 32 W).<br>- Mean BW 1089 g. (SD 420, range 530- 1828).<br>- Mean length of orotracheal intubation 34 D (SD 28.2, range 7-90).                                                                                                                                                                                                                                                                                                                                                                                                                                                                                                                                                                                                                                                                                                                                                                                                                                                                                                       | - Impression with thermoplastic material, dental cast.                                                                                                                                                                                                                                                                                                                                                                                                                                                                                                                                                                                                                                                                                                                                                                                                                                                                                                                                                                                                                                                                                                                                                                                                                                                                                                                 | - All children had high palatal vault.<br>- 28 % had palatal grooving.<br>- 16 % had posterior crossbite.<br>- Children intubated ≤ 15 D did not have palatal grooving or posterior crossbite.<br>- Children intubated ≥ 30 D had a higher incidence of effects than those intubated ≤ 30 D                                                                                                                                                                                                                                                                                                                                                                                                                                                                                                                                                                                                                                                                             |            |                   |                      |            |                     |        |        |   |                |        |       |      |           |        |       |      |                                             |          |          |   |             |           |               |            |                     |        |      |   |                |       |      |   |           |       |      |   |                            |          |          |   |
| [30]                                        | -See Tab. 1.                                                                                                                                                                                                                                                                                                                                                                                                                                                                                                                                                                                                                                                                                                                                                                                                                                                                                                                                                                                                                                                                                                                             | - See Tab. 1.                                                                                                                                                                                                                                                                                                                                                                                                                                                                                                                                                                                                                                                                                                                                                                                                                                                                                                                                                                                                                                                                                                                                                                                                                                                                                                                                                          | -Groove still present at 12, 13 and 12 MO.                                                                                                                                                                                                                                                                                                                                                                                                                                                                                                                                                                                                                                                                                                                                                                                                                                                                                                                              |            |                   |                      |            |                     |        |        |   |                |        |       |      |           |        |       |      |                                             |          |          |   |             |           |               |            |                     |        |      |   |                |       |      |   |           |       |      |   |                            |          |          |   |
| [37]                                        | - See Tab 5.                                                                                                                                                                                                                                                                                                                                                                                                                                                                                                                                                                                                                                                                                                                                                                                                                                                                                                                                                                                                                                                                                                                             |                                                                                                                                                                                                                                                                                                                                                                                                                                                                                                                                                                                                                                                                                                                                                                                                                                                                                                                                                                                                                                                                                                                                                                                                                                                                                                                                                                        | -Once the tube was removed, the anterior gum pad remoulded in most instances.<br>-See Tab. 2.                                                                                                                                                                                                                                                                                                                                                                                                                                                                                                                                                                                                                                                                                                                                                                                                                                                                           |            |                   |                      |            |                     |        |        |   |                |        |       |      |           |        |       |      |                                             |          |          |   |             |           |               |            |                     |        |      |   |                |       |      |   |           |       |      |   |                            |          |          |   |
| [8]                                         | -See Tab 2.                                                                                                                                                                                                                                                                                                                                                                                                                                                                                                                                                                                                                                                                                                                                                                                                                                                                                                                                                                                                                                                                                                                              | - See Tab. 2.                                                                                                                                                                                                                                                                                                                                                                                                                                                                                                                                                                                                                                                                                                                                                                                                                                                                                                                                                                                                                                                                                                                                                                                                                                                                                                                                                          |                                                                                                                                                                                                                                                                                                                                                                                                                                                                                                                                                                                                                                                                                                                                                                                                                                                                                                                                                                         |            |                   |                      |            |                     |        |        |   |                |        |       |      |           |        |       |      |                                             |          |          |   |             |           |               |            |                     |        |      |   |                |       |      |   |           |       |      |   |                            |          |          |   |
| [48]                                        | - <u>Study group: PT, LBW, intubated (59 % Caucasian, 54 % male):</u><br>- <u>43 3-5 Y old intubated LBW</u><br>- Mean BW 992.6 g (SD 196, range 595- 1247).<br>- Mean GA 28.9 W (SD 2.7, range 25- 36).<br>- Mean orotracheal intubation time 18.3 D (SD 21, range 1-99).<br>- Mean orogastric intubation time 55.6 D (SD 31, range 6- 169).<br>- <u>47 7-10 Y old intubated LBW</u><br>- Mean BW 1044.1 g (SD 288.2, range 537- 1616).<br>- Mean GA 28.7 W (SD 2.6, range 22-33).<br>- Mean orotracheal intubation 26.4 D (SD 31.4, range 1-99).<br>- Mean orogastric intubation time 52.4 D (SD 27.4, range 0-99).<br>- <u>Control group: mainly NBW, non intubated (56 % Caucasian, 51 % M):</u><br>- 40 3-5 Y old (with four exceptions not intubated and full term, mean BW 3465.0 g. (SD 425.4 (range 2781-4264)).<br>- 44 7-10 Y old, full term, mean BW 3485.9 g (SD 495.4, range 1814-4173).<br>- <u>Exclusion:</u> history of intubation, developmental difficulties, facial abnormalities, neural dysmorphologies, constant finger habits.<br>- <u>drop out study group:</u> 59 %.<br>- <u>drop out control group:</u> 56 %. | - Identification of LBW and neonatally intubated children by medical records.<br>- Intraoral inspection (high vaulted palate = high palate configuration relative to palate size) +<br>- Alginate impressions on pediatric stock trays, poured into stone models (to validate clinical assessment of high vaulted palate and palatal grooving).<br>- Asymmetry measured with a 3-dimensional rectangular cartesian coordinate system with respect to a fixed plane, comparison of values from reference points on contralateral sides to indicate discrepancies of the arch form in width and depth (3-5 Y old: on the lingual margin of central and lateral incisors and second primary molars; 7-10 Y old: correspondingly on the gingiva of the central and lateral incisors, canines and 6-year molars. Measurements by locating the widest aspects of the tooth and reflecting this point to the gingival margin. <u>Palatal width asymmetry:</u> Difference between measurements of the distance of contralateral measuring points to the median palatal raphe. <u>Palatal depth asymmetry:</u> locating the midpoint on a line between each reference point and the raphe and then measuring the vertical distance to the palate. Difference between contralateral sides to determine palatal depth asymmetry.<br>- Vidicom Qualifier 1210 (accuracy 0.001 mm). | <table border="1"> <tr> <td>3-5 Y olds</td> <td>intubated (n= 41)</td> <td>non-intubated (n=41)</td> <td>* p &lt; 0.05</td> </tr> <tr> <td>high vaulted palate</td> <td>63.4 %</td> <td>10.0 %</td> <td>*</td> </tr> <tr> <td>grooved palate</td> <td>14.6 %</td> <td>0.0 %</td> <td>* 1)</td> </tr> <tr> <td>crossbite</td> <td>22.0 %</td> <td>5.0 %</td> <td>* 1)</td> </tr> <tr> <td>palatal width second deciduous molar region</td> <td>24.02 mm</td> <td>25.33 mm</td> <td>*</td> </tr> </table><br><table border="1"> <tr> <td>7-10 Y olds</td> <td>intubated</td> <td>non-intubated</td> <td>* p &lt; 0.05</td> </tr> <tr> <td>high vaulted palate</td> <td>61.7 %</td> <td>9.0%</td> <td>*</td> </tr> <tr> <td>grooved palate</td> <td>23.4%</td> <td>0.0%</td> <td>*</td> </tr> <tr> <td>crossbite</td> <td>21.3%</td> <td>2.3%</td> <td>*</td> </tr> <tr> <td>palatal width molar region</td> <td>27.98 mm</td> <td>30.16 mm</td> <td>*</td> </tr> </table> | 3-5 Y olds | intubated (n= 41) | non-intubated (n=41) | * p < 0.05 | high vaulted palate | 63.4 % | 10.0 % | * | grooved palate | 14.6 % | 0.0 % | * 1) | crossbite | 22.0 % | 5.0 % | * 1) | palatal width second deciduous molar region | 24.02 mm | 25.33 mm | * | 7-10 Y olds | intubated | non-intubated | * p < 0.05 | high vaulted palate | 61.7 % | 9.0% | * | grooved palate | 23.4% | 0.0% | * | crossbite | 21.3% | 2.3% | * | palatal width molar region | 27.98 mm | 30.16 mm | * |
| 3-5 Y olds                                  | intubated (n= 41)                                                                                                                                                                                                                                                                                                                                                                                                                                                                                                                                                                                                                                                                                                                                                                                                                                                                                                                                                                                                                                                                                                                        | non-intubated (n=41)                                                                                                                                                                                                                                                                                                                                                                                                                                                                                                                                                                                                                                                                                                                                                                                                                                                                                                                                                                                                                                                                                                                                                                                                                                                                                                                                                   | * p < 0.05                                                                                                                                                                                                                                                                                                                                                                                                                                                                                                                                                                                                                                                                                                                                                                                                                                                                                                                                                              |            |                   |                      |            |                     |        |        |   |                |        |       |      |           |        |       |      |                                             |          |          |   |             |           |               |            |                     |        |      |   |                |       |      |   |           |       |      |   |                            |          |          |   |
| high vaulted palate                         | 63.4 %                                                                                                                                                                                                                                                                                                                                                                                                                                                                                                                                                                                                                                                                                                                                                                                                                                                                                                                                                                                                                                                                                                                                   | 10.0 %                                                                                                                                                                                                                                                                                                                                                                                                                                                                                                                                                                                                                                                                                                                                                                                                                                                                                                                                                                                                                                                                                                                                                                                                                                                                                                                                                                 | *                                                                                                                                                                                                                                                                                                                                                                                                                                                                                                                                                                                                                                                                                                                                                                                                                                                                                                                                                                       |            |                   |                      |            |                     |        |        |   |                |        |       |      |           |        |       |      |                                             |          |          |   |             |           |               |            |                     |        |      |   |                |       |      |   |           |       |      |   |                            |          |          |   |
| grooved palate                              | 14.6 %                                                                                                                                                                                                                                                                                                                                                                                                                                                                                                                                                                                                                                                                                                                                                                                                                                                                                                                                                                                                                                                                                                                                   | 0.0 %                                                                                                                                                                                                                                                                                                                                                                                                                                                                                                                                                                                                                                                                                                                                                                                                                                                                                                                                                                                                                                                                                                                                                                                                                                                                                                                                                                  | * 1)                                                                                                                                                                                                                                                                                                                                                                                                                                                                                                                                                                                                                                                                                                                                                                                                                                                                                                                                                                    |            |                   |                      |            |                     |        |        |   |                |        |       |      |           |        |       |      |                                             |          |          |   |             |           |               |            |                     |        |      |   |                |       |      |   |           |       |      |   |                            |          |          |   |
| crossbite                                   | 22.0 %                                                                                                                                                                                                                                                                                                                                                                                                                                                                                                                                                                                                                                                                                                                                                                                                                                                                                                                                                                                                                                                                                                                                   | 5.0 %                                                                                                                                                                                                                                                                                                                                                                                                                                                                                                                                                                                                                                                                                                                                                                                                                                                                                                                                                                                                                                                                                                                                                                                                                                                                                                                                                                  | * 1)                                                                                                                                                                                                                                                                                                                                                                                                                                                                                                                                                                                                                                                                                                                                                                                                                                                                                                                                                                    |            |                   |                      |            |                     |        |        |   |                |        |       |      |           |        |       |      |                                             |          |          |   |             |           |               |            |                     |        |      |   |                |       |      |   |           |       |      |   |                            |          |          |   |
| palatal width second deciduous molar region | 24.02 mm                                                                                                                                                                                                                                                                                                                                                                                                                                                                                                                                                                                                                                                                                                                                                                                                                                                                                                                                                                                                                                                                                                                                 | 25.33 mm                                                                                                                                                                                                                                                                                                                                                                                                                                                                                                                                                                                                                                                                                                                                                                                                                                                                                                                                                                                                                                                                                                                                                                                                                                                                                                                                                               | *                                                                                                                                                                                                                                                                                                                                                                                                                                                                                                                                                                                                                                                                                                                                                                                                                                                                                                                                                                       |            |                   |                      |            |                     |        |        |   |                |        |       |      |           |        |       |      |                                             |          |          |   |             |           |               |            |                     |        |      |   |                |       |      |   |           |       |      |   |                            |          |          |   |
| 7-10 Y olds                                 | intubated                                                                                                                                                                                                                                                                                                                                                                                                                                                                                                                                                                                                                                                                                                                                                                                                                                                                                                                                                                                                                                                                                                                                | non-intubated                                                                                                                                                                                                                                                                                                                                                                                                                                                                                                                                                                                                                                                                                                                                                                                                                                                                                                                                                                                                                                                                                                                                                                                                                                                                                                                                                          | * p < 0.05                                                                                                                                                                                                                                                                                                                                                                                                                                                                                                                                                                                                                                                                                                                                                                                                                                                                                                                                                              |            |                   |                      |            |                     |        |        |   |                |        |       |      |           |        |       |      |                                             |          |          |   |             |           |               |            |                     |        |      |   |                |       |      |   |           |       |      |   |                            |          |          |   |
| high vaulted palate                         | 61.7 %                                                                                                                                                                                                                                                                                                                                                                                                                                                                                                                                                                                                                                                                                                                                                                                                                                                                                                                                                                                                                                                                                                                                   | 9.0%                                                                                                                                                                                                                                                                                                                                                                                                                                                                                                                                                                                                                                                                                                                                                                                                                                                                                                                                                                                                                                                                                                                                                                                                                                                                                                                                                                   | *                                                                                                                                                                                                                                                                                                                                                                                                                                                                                                                                                                                                                                                                                                                                                                                                                                                                                                                                                                       |            |                   |                      |            |                     |        |        |   |                |        |       |      |           |        |       |      |                                             |          |          |   |             |           |               |            |                     |        |      |   |                |       |      |   |           |       |      |   |                            |          |          |   |
| grooved palate                              | 23.4%                                                                                                                                                                                                                                                                                                                                                                                                                                                                                                                                                                                                                                                                                                                                                                                                                                                                                                                                                                                                                                                                                                                                    | 0.0%                                                                                                                                                                                                                                                                                                                                                                                                                                                                                                                                                                                                                                                                                                                                                                                                                                                                                                                                                                                                                                                                                                                                                                                                                                                                                                                                                                   | *                                                                                                                                                                                                                                                                                                                                                                                                                                                                                                                                                                                                                                                                                                                                                                                                                                                                                                                                                                       |            |                   |                      |            |                     |        |        |   |                |        |       |      |           |        |       |      |                                             |          |          |   |             |           |               |            |                     |        |      |   |                |       |      |   |           |       |      |   |                            |          |          |   |
| crossbite                                   | 21.3%                                                                                                                                                                                                                                                                                                                                                                                                                                                                                                                                                                                                                                                                                                                                                                                                                                                                                                                                                                                                                                                                                                                                    | 2.3%                                                                                                                                                                                                                                                                                                                                                                                                                                                                                                                                                                                                                                                                                                                                                                                                                                                                                                                                                                                                                                                                                                                                                                                                                                                                                                                                                                   | *                                                                                                                                                                                                                                                                                                                                                                                                                                                                                                                                                                                                                                                                                                                                                                                                                                                                                                                                                                       |            |                   |                      |            |                     |        |        |   |                |        |       |      |           |        |       |      |                                             |          |          |   |             |           |               |            |                     |        |      |   |                |       |      |   |           |       |      |   |                            |          |          |   |
| palatal width molar region                  | 27.98 mm                                                                                                                                                                                                                                                                                                                                                                                                                                                                                                                                                                                                                                                                                                                                                                                                                                                                                                                                                                                                                                                                                                                                 | 30.16 mm                                                                                                                                                                                                                                                                                                                                                                                                                                                                                                                                                                                                                                                                                                                                                                                                                                                                                                                                                                                                                                                                                                                                                                                                                                                                                                                                                               | *                                                                                                                                                                                                                                                                                                                                                                                                                                                                                                                                                                                                                                                                                                                                                                                                                                                                                                                                                                       |            |                   |                      |            |                     |        |        |   |                |        |       |      |           |        |       |      |                                             |          |          |   |             |           |               |            |                     |        |      |   |                |       |      |   |           |       |      |   |                            |          |          |   |
|                                             |                                                                                                                                                                                                                                                                                                                                                                                                                                                                                                                                                                                                                                                                                                                                                                                                                                                                                                                                                                                                                                                                                                                                          |                                                                                                                                                                                                                                                                                                                                                                                                                                                                                                                                                                                                                                                                                                                                                                                                                                                                                                                                                                                                                                                                                                                                                                                                                                                                                                                                                                        | - Defects were not influenced by length of intubation.<br>- * = chi square test<br>- 1 = results of this analysis are not reliable due to low expected cell frequencies.<br>- Analysis of variance revealed significant relationships between high vaulted palate, palatal grooving, crossbite and both, BW and GA                                                                                                                                                                                                                                                                                                                                                                                                                                                                                                                                                                                                                                                      |            |                   |                      |            |                     |        |        |   |                |        |       |      |           |        |       |      |                                             |          |          |   |             |           |               |            |                     |        |      |   |                |       |      |   |           |       |      |   |                            |          |          |   |

|      |                                                                                                                                                                                                                                                                                                                                                                                                                                                                                                                                                                                               |                                                                                                                                                                                                                                                                                                                                                                                                                                                                                                                                                                                                                                                                                                                                                                                                                                                                                                                                                                                                                                                                                                                                               |                                                                                                                                                                                                                                                                                                                                                  |
|------|-----------------------------------------------------------------------------------------------------------------------------------------------------------------------------------------------------------------------------------------------------------------------------------------------------------------------------------------------------------------------------------------------------------------------------------------------------------------------------------------------------------------------------------------------------------------------------------------------|-----------------------------------------------------------------------------------------------------------------------------------------------------------------------------------------------------------------------------------------------------------------------------------------------------------------------------------------------------------------------------------------------------------------------------------------------------------------------------------------------------------------------------------------------------------------------------------------------------------------------------------------------------------------------------------------------------------------------------------------------------------------------------------------------------------------------------------------------------------------------------------------------------------------------------------------------------------------------------------------------------------------------------------------------------------------------------------------------------------------------------------------------|--------------------------------------------------------------------------------------------------------------------------------------------------------------------------------------------------------------------------------------------------------------------------------------------------------------------------------------------------|
| [49] | - See Tab. 3.                                                                                                                                                                                                                                                                                                                                                                                                                                                                                                                                                                                 | - See Tab. 3.                                                                                                                                                                                                                                                                                                                                                                                                                                                                                                                                                                                                                                                                                                                                                                                                                                                                                                                                                                                                                                                                                                                                 | - Duration of orotracheal intubation did not influence the degree of palatal deformation.                                                                                                                                                                                                                                                        |
| [23] | - 49 PT (23 m, 26 f)<br>- Ø BW 1213 g (range 605 g– 1500 g)<br>- Ø age at impression 3 Y, 3 M (range 26 M to 5 Y, 5 MO);<br>- 18 with endotracheal intubation <sup>1</sup> ;<br>- 31 without endotracheal intubation and mechanical intubation <sup>1</sup><br>- Exclusion: neurological abnormalities, facial dysmorphism, clefts, finger sucking one Y prior to investigation, further intubation after leaving hospital after birth.<br>-<br>- <sup>1</sup> The authors give contradictory information on intubation, on pp. 33 and 34 of the article, they mention 22 intubated children. | - Dental examination.<br>- Stone models from compound maxillary impression on plastic spoon.<br>- Measurements at the primary lateral incisors, canines and first molars, by drawing tangents to the mesiopalatal and distopalatal surfaces and projecting a line bisecting the angle of the intersection to the gingival margin, reference line was median palate raphe.<br>- Reference point of each tooth at the gingival margin to determine symmetry.<br>- Olivetti inspector machine to determine the 3 dimensional coordinates of the reference points.<br>- Measurements to the nearest 0.1mm.<br>- Accuracy of the measuring method: SD 0.1-0.4 of the 3 measurements taken of any one model; difference between models NS.<br>- Location of reference points on the gingival margins of deciduous lateral incisors, canines and primary molars x, y and z coordinates of reference points determined directly by the Olivetti inspector machine, allowing measurements to the nearest 0.1 mm.<br>- Symmetry of the 2 models taken from each patient showed no statistical significant differences (level of significance: p ≤ 0.1). | - No palatal grooves.<br>- No statistically significant differences between groups.<br>- No palatal asymmetry 2-5 Y after intubation.<br>- Length of intubation does not affect palatal symmetry                                                                                                                                                 |
| [13] | - N = 1 (f), 1230 g, GA 28 W, caesarean section; orotracheal tube for 8 D; Complications: pneumothorax and neonatal jaundice; at 8 D orogastric tube and acrylic feeding plate;                                                                                                                                                                                                                                                                                                                                                                                                               | - Impressions at 8 D, 4 and 21 MO                                                                                                                                                                                                                                                                                                                                                                                                                                                                                                                                                                                                                                                                                                                                                                                                                                                                                                                                                                                                                                                                                                             | - Normal palatal shape at 8 D; palatal V shape and 'deep groove' at 4 MO.                                                                                                                                                                                                                                                                        |
| [13] | - N= 1 (m), 1050 g, GA 28 W, vaginal delivery; orotracheal tube for 4 MO, subsequently orogastric tube and acrylic feeding plate for 3 W                                                                                                                                                                                                                                                                                                                                                                                                                                                      | - Impressions at 4, 5, 6, 7, 10, 25 MO<br>- No further description of method given.                                                                                                                                                                                                                                                                                                                                                                                                                                                                                                                                                                                                                                                                                                                                                                                                                                                                                                                                                                                                                                                           | - 5 mm deep groove.<br>- After use of a feeding plate reduction in width but not depth of the groove.<br>- Groove persisted until 10 MO of age the (no change in depth but a progressive increase in width).                                                                                                                                     |
| [17] | - See above.                                                                                                                                                                                                                                                                                                                                                                                                                                                                                                                                                                                  | - See above.                                                                                                                                                                                                                                                                                                                                                                                                                                                                                                                                                                                                                                                                                                                                                                                                                                                                                                                                                                                                                                                                                                                                  | - Six MO after extubation 23 / 40 patients with grooves at the time of extubation returned:<br>- 16 (70 %) had persisting grooves (mean GA 30.5, SD 2.8, intubated mean 86.3 D, SD 62.5).<br>- Other 7 (30%) (mean GA 30.3 W, SD 3.2, intubated 24- 154 D, mean 56.3+/-44.2) had high arched palates.                                            |
| [16] | - All neonates in the NBICU intubated >2 W;<br>- 40 PT neonates.<br>- GA 25-37 W (mean 30.0 +/- 2.6).<br>- Intubation for 14-243 D (67.6 +/- 51.1).                                                                                                                                                                                                                                                                                                                                                                                                                                           | - Wax impressions of the palate at the time of extubation and six MO later.                                                                                                                                                                                                                                                                                                                                                                                                                                                                                                                                                                                                                                                                                                                                                                                                                                                                                                                                                                                                                                                                   | - Six MO after extubation 18 / 40 patients with grooves at the time of extubation returned:<br>- none of the palates appeared normal.<br>- 12 (67 %) had persisting grooves (mean GA 31.0 W, SD 2.7, intubated mean 81.6 D, SD 49.9);<br>- the other 6 (33%) (mean GA 30.7 W, SD 3.3, intubated 24-154 D, SD 57+/-48.4) had high arched palates. |

BW = birthweight, D = day(s), F = female, GA = gestational age, GW = gestational weeks; H = hour(s); LBW = low birthweight, M = male, MO = month(s), NBW = normal birthweight, NS = not significant, PT = preterm, VLBW = very low birthweight, W = weeks, Y = year(s).
