# Supplementary material for: Palatal development of preterm and low birthweight infants compared to term infants – What do we know? Part 2: The palate of the preterm/low birthweight infant
Source: PubMed Central journal article supplement (PMC1298321; doi:10.1186/1746-160x-1-9), 2005-10-28
Supplement: 1746-160X-1-9-S3.pdf [file 1746-160X-1-9-S3.pdf]

**Tab. 3.** Influence of birthweight on palatal morphology of preterm / low birthweight infants.

| <b>studies</b>                 | <b>[24]</b>     | <b>[1]</b>                     | <b>[56]</b>                                                                                                                      |
|--------------------------------|-----------------|--------------------------------|----------------------------------------------------------------------------------------------------------------------------------|
| <b>N</b>                       | - 25            | - 37                           | - 49                                                                                                                             |
| <b>mean BW (g.)</b>            | - 1089 +/- 420  | - 1089 +/- 228                 | - 1213 (range 605-1500)                                                                                                          |
| <b>GA at birth (weeks)</b>     | - 29.3 +/- 4.1  | - 29 +/-2                      | - not given                                                                                                                      |
| <b>% of children intubated</b> | - 100           | - 72                           | - 36 or 44.9 or 63.3 or 53.1 (author gives contradictory information on pages 30, 32 and 34)                                     |
| <b>D intubated</b>             | - 34 +/-28.2    | - 34.5 +/- 28.7                | - 1-64                                                                                                                           |
| <b>Age at examination</b>      | - 2-5 Y         | - 9 M – 6.25 Y                 | - 2.2- 5.4 Y                                                                                                                     |
| <b>palatal deformation</b>     | - 28 % grooving | - 37 % very high arched palate | - 0 % palatal grooves, insignificant differences between intubated and non- intubated children with respect to palatal asymmetry |

(BW = birthweight, GA= gestational age, MO = month(s); D= day(s), Y= year(s); M = male, F = female).
