# Supplementary material for: Palatal development of preterm and low birthweight infants compared to term infants – What do we know? Part 2: The palate of the preterm/low birthweight infant
Source: PubMed Central journal article supplement (PMC1298321; doi:10.1186/1746-160x-1-9), 2005-10-28
Supplement: 1746-160X-1-9-S5.pdf [file 1746-160X-1-9-S5.pdf]

**Table 5.** Crosstabes for palatal measurements [mm]: preterm (LBW) vs. term (NBW) [all values are means; (SD in parenthesis)]; ~: no data given; <sup>1</sup> Type I: pads meet in the region of the molar segments just as, later on, provided the occlusion is normal, mandibular molars lie lingual to the maxillary; anterior margin of the first molar segment slightly anterior to anterior margin of maxillary first molar segment. Type II: distal displacement of the mandible, anterior borders of molar segments lie posterior to anterior borders of corresponding maxillary segments. Type III: mandibular pad is entirely smaller than the maxillary (see Tab. 3, Part 1); <sup>2</sup>Owing to shortcomings in impressions it was not always possible to locate postgingivae with certainty [38]. \* Values calculated from original data by the authors. Due to missing information on degree of childrens' maturity at birth no valid assignment into a group of term infants is possible with the exception of the papers [69], [74], [73] and [38]. Studies included in this table, however represent the best evidence that is possible until now. \* Recalculation of original data given by [52] and [75] by the authors of the review allowed inclusion of these dissertation, while using data calculated for term or PT infants, respectively, exclusively. Data is limited to comparable measurements.

| PT / LBW<br>- n/ sex/<br>- GA at birth/ BW/<br>- corr. age/ weight (at<br>impression)<br>- %/ hours of<br>intubation (h) | Outer palatal<br>width at lateral<br>sulci                                                   | Inner palatal<br>width at lateral<br>sulci                                                   | Distance between<br>postgingivae <sup>2</sup>                                              | Maximum width<br>(at the crest of the<br>alveolar ridge<br>perpendicular to the<br>raphe mediana) | Depth with reference to<br>the apices of the<br>interdental papilla<br>between primary first<br>and second molars | Maximum depth<br>(measured from a<br>horizontal reference<br>plane on the crest of the<br>alveolar ridge) | Depths with reference to<br>the lateral alveolar<br>margins |
|--------------------------------------------------------------------------------------------------------------------------|----------------------------------------------------------------------------------------------|----------------------------------------------------------------------------------------------|--------------------------------------------------------------------------------------------|---------------------------------------------------------------------------------------------------|-------------------------------------------------------------------------------------------------------------------|-----------------------------------------------------------------------------------------------------------|-------------------------------------------------------------|
| [37]                                                                                                                     | - 15/ 5 F, 10 M./<br>- 29 W GA (1.5)/<br>1.42 kg (0.36)<br>- term/~<br>- -/-<br>22.61 (2.50) | - 15/ 5 F, 10 M./<br>- 29 W GA (1.5)/<br>1.42 kg (0.36)<br>- term/~<br>- -/-<br>16.58 (1.67) | - 15/ 5F, 10 M/<br>- 29 W GA (1.5)/ 1.42<br>kg (0.36)<br>- term/~<br>- -/-<br>24.24 (1.66) |                                                                                                   |                                                                                                                   |                                                                                                           |                                                             |
| [45]                                                                                                                     |                                                                                              |                                                                                              |                                                                                            |                                                                                                   | - 52/~<br>- 29.4 W (3.4) / 1151 g<br>(418.3)<br>- 2- 5 Y, ~<br>- ~/ 26 D (24.5)<br>12.9 (1.92)                    |                                                                                                           |                                                             |
| [46]                                                                                                                     |                                                                                              |                                                                                              |                                                                                            | - 27 / ~<br>- 30.7 W (2.8) / ~<br>- 37.6 W (3.15) / ~<br>- -/-<br>26.8 (1.54)                     |                                                                                                                   | - 27 / ~<br>- 30.7 W (2.8) / ~<br>- 37.6 W (3.15) / ~<br>- -/-<br>6.84 (0.73)                             |                                                             |
| *[52]                                                                                                                    |                                                                                              |                                                                                              |                                                                                            | - 10 / ~<br>- 30.7 W (2.8) / ~<br>- 53.8 W (5.9) / ~<br>- -/-<br>31.3 (2.71)                      |                                                                                                                   | - 10 / ~<br>- 30.7 (2.8) W / ~<br>- 53.8 (5.9) W / ~<br>- -/-<br>8.83 (0.75)                              |                                                             |
| [49]                                                                                                                     |                                                                                              |                                                                                              |                                                                                            | *31.5<br>- 23 / ~<br>- 29.2 W GA / 1215 g<br>(227)                                                |                                                                                                                   | - 23 / ~<br>- 29.2 W GA / 1215 g<br>(227)                                                                 |                                                             |

|  |       |  |  |                                                                                                                                                                                                                                                                   |       |  |  |                                                                                           |                                                                                             |
|--|-------|--|--|-------------------------------------------------------------------------------------------------------------------------------------------------------------------------------------------------------------------------------------------------------------------|-------|--|--|-------------------------------------------------------------------------------------------|---------------------------------------------------------------------------------------------|
|  |       |  |  | - 29.2 W GA + 2- 7 D /<br>~<br>- 65 %/ 165 H (532)<br>22.6 (1.8)<br>- *11/ 7 F, 4 M<br>-~/2897.8 (377.6)<br>1-7 D after birth<br>(corrected age not<br>given), spontaneously<br>delivered exclusively,<br>all occipito- anterior<br>vertex presentation/~<br>-~/~ |       |  |  | - 29.2 W GA + 2- 7 D /~<br><br>- 65 %/ 165 H (532)<br>6.1 (0.7)                           |                                                                                             |
|  | *[53] |  |  |                                                                                                                                                                                                                                                                   |       |  |  |                                                                                           |                                                                                             |
|  | [50]  |  |  |                                                                                                                                                                                                                                                                   | *30.1 |  |  |                                                                                           |                                                                                             |
|  |       |  |  |                                                                                                                                                                                                                                                                   |       |  |  | - 19 /~<br>- < 32 W (median 1880)<br>- 28 W/~<br>- 19 < 10 D, 4 > 10 D<br>6.2 (0.36)      | - 19 /~<br>- < 32 W (median 1880)<br>- 28 W/~<br>- 19 < 10 D, 4 > 10 D<br>6.2 (0.36)        |
|  |       |  |  |                                                                                                                                                                                                                                                                   |       |  |  | - 15 /~<br>- < 32 W/ (median 1880)<br>- 36 W./~<br>- 19 < 10 D, 4 > 10 D<br>7.05 (0.23)   | - 15 /~<br>- < 32 W/ (median 1880)<br>- 36 W./~<br>- 19 < 10 D, 4 > 10 D<br>7.05 (0.23)     |
|  |       |  |  |                                                                                                                                                                                                                                                                   |       |  |  | - 9 /~<br>- < 32 W/ (median 1880)<br>- 53 W./~<br>- ~/ 19 < 10 D, 4 > 10 D<br>9.0 (0.15)  | - 9 /~<br>- < 32 W/ (median 1880)<br>- 53 W/~<br>- ~/ 19 < 10 D, 4 > 10 D<br>9.0 (0.15)     |
|  |       |  |  |                                                                                                                                                                                                                                                                   |       |  |  | - 10 /~<br>- < 32 W/ (median 1880)<br>- 66 W/~<br>- ~/ 19 < 10 D, 4 > 10 D<br>8.82 (0.76) | - 10 /~<br>- < 32 W/ (median 1880)<br>- 66 W/~<br>- ~/ 19 < 10 ds., 4 > 10 D<br>8.82 (0.76) |

| TERM<br>- n/sex/ BW/<br>- age / weight (at<br>impression) | Outer palatal<br>width<br>at lateral sulci                  | Inner palatal<br>width<br>at lateral sulci | Distance between<br>postgingivae | Maximum width<br>(at the crest of the<br>alveolar ridge<br>perpendicular to the<br>raphe mediana) | Depth with reference to<br>the apices of the<br>interdental papilla<br>between primary first<br>and second molars | Maximum depth (height)<br>(measured from a<br>horizontal reference<br>plane on the crest of the<br>alveolar ridge) | Depths < maximum<br>depths |
|-----------------------------------------------------------|-------------------------------------------------------------|--------------------------------------------|----------------------------------|---------------------------------------------------------------------------------------------------|-------------------------------------------------------------------------------------------------------------------|--------------------------------------------------------------------------------------------------------------------|----------------------------|
| [67]                                                      | N = see below/ ~<br>/~<br>- 3.7 D (2.8)<br>(n=78)/ 3315.0 g |                                            | - N = see below/ ~/ ~            | - N = see below/ ~/ ~<br>- 3.7 D (2.8) (n=78)/<br>3315.0 g (539.5)                                | - 3.7 D (2.8) (n=78)/<br>3315.0 g (539.5)                                                                         | - 3.7 D (2.8) (n=78)/<br>3315.0 g (539.5) (n=90)                                                                   |                            |

|       |                                                                                                                                                    |                                                                                                          |                                                                                                           |                                                                                                                                                 |
|-------|----------------------------------------------------------------------------------------------------------------------------------------------------|----------------------------------------------------------------------------------------------------------|-----------------------------------------------------------------------------------------------------------|-------------------------------------------------------------------------------------------------------------------------------------------------|
|       | (539.5) (n=90)<br>25.5 (1.5) (n=82)                                                                                                                | (n=90)<br>25.5 (1.2) (n=90)<br>- M: 89 / 3.32 kg<br>- birth / M: 3.32 kg<br>M: 25.5 (1.20)               | (n=90)<br>30.6 (1.5) (n=90)<br>- M: 89 / 3.32 kg<br>- birth / M: 3.32 kg<br>m.:30.6 (1.50)                | 7.6 (2.0)<br>- M.:89 /3.32 kg ~<br>- birth /M: 3.32 kg<br>M.:7.6 (2.0)                                                                          |
| [68]  |                                                                                                                                                    | - m: 36, F:26/M.: 3.32 kg, F:~<br>- 8-1 5 W/ M.: 4.28 kg, F: 3.72 kg<br>M.: 27.7 (2.36)<br>F:26.4 (1.50) | - M: 36, F: 26/ M.: 3.32 kg, F:~<br>- 8-15 W/ M.: 4.28 kg, F: 3.72 kg<br>M: 32.6 (2.68)<br>F: 30.5 (2.04) | - M: 36, F:26/M.: 3.32 kg, F:~<br>- 8-15 W/ M: 4.28 kg, F: 3.72 kg<br>M.: 9.5 (1.24)<br>F: 9.0 (1.15)                                           |
|       |                                                                                                                                                    | - M: 36, F: 10/M: 3.32 kg, F:~<br>- 24-31 W/ M: 6.29 kg, F: 6.20<br>M: 30.2 (2.12),<br>F: 28.1 (1.70)    | - M.:36, F: 10/M.: 3.32 kg, F:~<br>- 24- 31 W/ M.: 6.29 kg, F: 6.20<br>M.: 35.4 (2.50)<br>F: 33.6 (2.16)  | - M.:36, F: 10/ M.: 3.32 kg, F:~<br>- 24- 31 W/ M.: 6.29 kg, F: 6.20<br>M: 10.3 (1.03)<br>F: 9.6 (1.01)                                         |
| [69]  | - N = see below/ ~<br>- < 8 D / ~<br>Type I: 25.29 (n=32) <sup>1</sup><br>Type II: 24.48 (n=25) <sup>1</sup><br>Type III: 24.00 (n=4) <sup>1</sup> |                                                                                                          |                                                                                                           | - N = see below/ ~<br>- < 8 D / ~<br>Type I: 7.14 (n=32) <sup>1</sup><br>Type II: 7.58 (n=25) <sup>1</sup><br>Type III: 8.75 (n=4) <sup>1</sup> |
| [70]  |                                                                                                                                                    |                                                                                                          | - 6./ 5 M, 1 F/ ~<br>- within one W after birth/ ~<br>34.94<br>-at six MO<br>38,38                        |                                                                                                                                                 |
| [71]  |                                                                                                                                                    |                                                                                                          | -1- 4 D after birth<br>M: 31.45 (0,08)<br>F: 30.43 (0,07)                                                 | - 1- 4 D after birth<br>M: 8.00 (0.043)<br>F: 7.81 (0,045)                                                                                      |
| [45]  |                                                                                                                                                    |                                                                                                          |                                                                                                           | - 45/ ~/ ~<br>- 2- 5 Y<br>11.4 (2.16).                                                                                                          |
| [72]  |                                                                                                                                                    |                                                                                                          |                                                                                                           | - 32/ ~/ ~<br>- ≥ 5 Y./ ~/ ~<br>13.09 (1.40)                                                                                                    |
| *[52] |                                                                                                                                                    |                                                                                                          | - *54/~ /3469.8 g. length<br>50.9 cm, biggest head circumference = 35.2 cm<br>33.9                        |                                                                                                                                                 |

|       |                                                                                      |                                                                                      |                                                                                                                                                                                                                                                               |                                                                                |
|-------|--------------------------------------------------------------------------------------|--------------------------------------------------------------------------------------|---------------------------------------------------------------------------------------------------------------------------------------------------------------------------------------------------------------------------------------------------------------|--------------------------------------------------------------------------------|
| [74]  | - 388/~/~<br>- at birth/~/~<br>28.5 (1.45)                                           | - 388/~/~<br>- at birth/~/~<br>20.17 (1.22)                                          |                                                                                                                                                                                                                                                               |                                                                                |
| [74]  | -34 Caucasian/~/~<br>5.754 lbs (0.823)<br>-6.5 D (3.5)/~/~<br>26.37 (1.71)           | -34 Caucasian/~/~<br>5.754 lbs (0.823)<br>-6.5 D (3.5)/~/~<br>18.75 (1.49)           |                                                                                                                                                                                                                                                               | -34 Caucasian/~/~ 5.754<br>lbs (0.823)<br>-6.5 D (3.5)/~/~<br>7.57 (0.73)      |
|       | -34 Afro-Carribean/~/~<br>5.747 (0.773)<br>-4.9 D (2.8)<br>27.54 (1.22)<br>(p=0.002) | -34 Afro-Carribean/~/~<br>5.747 (0.773)<br>-4.9 D (2.8)<br>19.56 (1.37)<br>(p=0.024) |                                                                                                                                                                                                                                                               | -34 Afro-Carribean/~/~<br>5.747 (0.773)<br>-4.9 D (2.8)<br>7.25 (0.78)<br>(NS) |
| [38]  |                                                                                      | - 109/~/~<br>- at the visit<br>nearest 6 MO 6.5<br>(1.26)/~/~<br>22.66 (1.713)       | - 91/~/~<br>- at the visit nearest 6<br>MO 6.5 (1.26)/~/~<br>30.91 (2.21)                                                                                                                                                                                     | - 109/~/~<br>- at the visit nearest 6<br>MO 6.5 (1.26)/~/~<br>32.95 (2.46)     |
| *[53] |                                                                                      |                                                                                      | -F: 49/ F/ 3397.4 g.<br>-1-7 D/~/~ mean size<br>49.9 cm, spontaneous<br>delivery, occipito-<br>anterior vertex<br>presentation<br>*30.2<br>-*M:52/ M/ 3510.0 g<br>- 1-7 D/~/~ spontaneous<br>delivery, occipito-<br>anterior vertex<br>presentation<br>* 30.3 |                                                                                |
| [75]  |                                                                                      |                                                                                      | -4-48 H after birth<br>M (n=525): 30.66 (0.07)<br>F (n= 470): 29.68 (0.08)                                                                                                                                                                                    | - 4- 48 H after birth<br>M (523): 8.31 (0.08)<br>F: 8.16 (0,08)                |
| [76]  |                                                                                      |                                                                                      | - at birth [71]:<br>30.99<br>- 4 MO: 33.6<br>- 8 MO: 36.12<br>- 12 MO: 37.41                                                                                                                                                                                  | - 4 MO: 10.02<br>- 8 MO: 11.31<br>- 12 MO 12.25                                |
| [77]  |                                                                                      |                                                                                      | - 12/ 6 M., 6 F/~/~<br>- 0 ≤ 3 MO /~/~<br>31.23                                                                                                                                                                                                               | - 12/ 6 M., 6 F/~/~<br>- 0 ≤ 3 MO /~/~<br>8.76                                 |
|       |                                                                                      |                                                                                      | - 9 / 4 M., 5 F/~/~<br>- 3 ≤ 6 MO /~/~                                                                                                                                                                                                                        | - 9 / 4 M., 5 F/~/~<br>- 3 ≤ 6 MO /~/~                                         |

|                        | <u>32.31</u>   | <u>9.61</u>    |
|------------------------|----------------|----------------|
|                        | - 5/ 4 M., 1 F | - 5/ 4 M., 1 F |
|                        | - 6 ≤ 9 MO/ ~  | - 6 ≤ 9 MO/ ~  |
|                        | 33.65          | 9.77           |
| <b>[78]</b> - 39/ M/ ~ |                |                |
| 1-11 D/ > 3 kg         |                |                |
| 26.3 (1.74)            |                |                |
| - 45/ F/ ~             |                |                |
| 1- 11 D/ > 3 kg        |                |                |
| 25.9 (1.37)            |                |                |
| - 84/ both sexes/ ~    |                |                |
| - 1- 11 D/ > 3kg       |                |                |
| 26.1                   |                |                |

BW = birthweight, D = day(s), F = female, GA = gestational age, GW = gestational weeks; H = hour(s); LBW = low birthweight, M = male, MO = month(s), NBW = normal birthweight, NS = not significant, PT = preterm, VLBW = very low birthweight, W = weeks, Y = year(s).
