# Supplementary material for: Palatal development of preterm and low birthweight infants compared to term infants – What do we know? Part 2: The palate of the preterm/low birthweight infant
Source: PubMed Central journal article supplement (PMC1298321; doi:10.1186/1746-160x-1-9), 2005-10-28
Supplement: 1746-160X-1-9-S6.pdf [file 1746-160X-1-9-S6.pdf]

**Table 6.** Metrical studies with respect to vertical palatal dimension of intubated PT infants (deciduous dentition).

| <b>Study</b>                   | <b>[45]</b>                         | <b>[23]</b>                        | <b>[48]</b>                        |
|--------------------------------|-------------------------------------|------------------------------------|------------------------------------|
| - age (years)                  | 2-5                                 | 2-5                                | 3-5                                |
| - BW (g)                       | Ø 1151 (SD 418)<br>(range 530-2263) | Ø 1213 (SD ne)<br>(range 605-1500) | Ø 993 (SD 196)<br>(range 595-1247) |
| - GA (weeks)                   | Ø 29.4 (SD 3.4)                     | ne                                 | Ø 28.9 (2.7)                       |
| - intubation time (days)       | Ø 26 (SD 24.5)<br>(range 1-90)      | Ø ne (SD ne)<br>(range 3-64)       | Ø 18.3 (SD 21)<br>(range 1-99)     |
| - sucking habits               | ne                                  | no                                 | no                                 |
| - method                       | measurements of casts               | measurements of casts              | measurements of casts              |
| - control group                | yes                                 | yes                                | yes                                |
| - palatal grooving             | 25 %                                | 0 %                                | 14.6 % *                           |
| - high palatal vault           | 69 %                                | ne                                 | 63 % *                             |
| - differences in palatal depth | yes*                                | ne                                 | ns                                 |
| - palatal depth asymmetry      | ne                                  | ne                                 | Yes *                              |

\* = p<.05, ns = not significant, ne = not evaluated, Ø = mean, SD = standard deviation.
