# Supplementary material for: Palatal development of preterm and low birthweight infants compared to term infants – What do we know? Part 2: The palate of the preterm/low birthweight infant
Source: PubMed Central journal article supplement (PMC1298321; doi:10.1186/1746-160x-1-9), 2005-10-28
Supplement: 1746-160X-1-9-S8.pdf [file 1746-160X-1-9-S8.pdf]

**Table 8.** Metrical studies with respect to transverse palatal dimension of intubated PT infants (deciduous dentition).

| Study                                             | [45]                                  | [23]                                 | [48]                                 |
|---------------------------------------------------|---------------------------------------|--------------------------------------|--------------------------------------|
| <b>deciduous dentition</b>                        |                                       |                                      |                                      |
| - age (years)                                     | - 2-5                                 | - 2-5                                | - 3-5                                |
| - BW (g)                                          | - Ø 1151 (SD 418)<br>(range 530-2263) | - Ø 1213 (SD ne)<br>(range 605-1500) | - Ø 993 (SD 196)<br>(range 595-1247) |
| - GA (weeks)                                      | - Ø 29.4 (SD 3.4)                     | - ne                                 | - Ø 28.9 (2.7)                       |
| - intubation time (days)                          | - Ø 26 (SD 24.5)<br>(range 1-90)      | - Ø ne (SD ne)<br>(range 3-64)       | - Ø 18 (SD 21)<br>(range 1-99)       |
| - Method                                          | - measurements of casts               | - measurements of casts              | - measurements of casts              |
| - control group                                   | - yes                                 | - yes                                | - yes                                |
| - sucking habits                                  | - ne                                  | - no                                 | - no                                 |
| - crossbite                                       | - 17 % (ns)                           | - ne                                 | - 22 % *                             |
| - palatal width smaller compared to control group | - ne                                  | - ne                                 | - yes*                               |
| - posterior palatal width asymmetry               | - ne                                  | - no                                 | - yes *                              |
| <b>mixed dentition</b>                            |                                       |                                      |                                      |
| - age (years)                                     | -                                     | -                                    | 7-10                                 |
| - BW (g)                                          | -                                     | -                                    | Ø 1044 (SD 288, range 537-1616)      |
| - GA (weeks)                                      | -                                     | -                                    | Ø 29 (SD 2.6, range 22-33)           |
| - intubation time (days)                          | -                                     | -                                    | Ø 26 (SD 31 range 0-99)              |
| - method                                          | -                                     | -                                    | measurements of casts                |
| - control group                                   | -                                     | -                                    | yes                                  |
| - sucking habits                                  | -                                     | -                                    | no                                   |
| - crossbite                                       | -                                     | -                                    | 21.3 % *                             |
| - palatal width smaller compared to control group | -                                     | -                                    | yes *                                |
| - posterior palatal width asymmetry               | -                                     | -                                    | yes *                                |

\* = p<.05, ns = not significant, ne = not evaluated, Ø = mean, SD = standard deviation.
