# Supplementary material for: Palatal development of preterm and low birthweight infants compared to term infants – What do we know? Part 2: The palate of the preterm/low birthweight infant
Source: PubMed Central journal article supplement (PMC1298321; doi:10.1186/1746-160x-1-9), 2005-10-28
Supplement: 1746-160X-1-9-S9.pdf [file 1746-160X-1-9-S9.pdf]

**Table 9.** Metrical studies with respect to transverse palatal dimension of intubated PT infants (mixed dentition); (\* = p<.05, ns = not significant, ne = not evaluated, Ø = mean, SD = standard deviation).

| <b>Study</b>                                      | <b>[48]</b>                     | <b>[10]</b>                  |
|---------------------------------------------------|---------------------------------|------------------------------|
| - age (years)                                     | 7-10                            | 8-11                         |
| - BW (g)                                          | Ø 1044 (SD 288, range 537-1616) | Ø ne (SD ne, range 957-2040) |
| - GA (weeks)                                      | Ø 29 (SD 2.6, range 22-33)      | Ø ne (range 20-37)           |
| - intubation time (days)                          | Ø 26 (SD 31 range 0-99)         | Ø 15 (range 1-58)            |
| - method                                          | measurements of casts           | measurements of casts        |
| - control group                                   | yes                             | yes                          |
| - sucking habits                                  | no                              | no                           |
| - crossbite                                       | 21.3 % *                        | ns                           |
| - palatal width smaller compared to control group | yes *                           | yes *                        |
| - posterior palatal width asymmetry               | yes *                           | yes *                        |
